# Supplementary material
Source: PubMed Central journal article supplement (PMC7876622)
Supplement: jamasurg-e207083-s001.pdf [file jamasurg-e207083-s001.pdf]

## Supplementary Online Content

Kernodle AB, Zhang W, Motter JD, et al. Examination of racial and ethnic differences in deceased organ donation ratio over time in the US. *JAMA Surg*. Published online February 10, 2021. doi:10.1001/jamasurg.2020.7083

**eTable 1.** Crude Counts of Actual and Potential Donors per Year

**eTable 2.** Crude Counts of Actual and Potential Donors per Race per Year

**eTable 3.** Crude Counts of Actual and Potential Donors per Ethnicity per Year

**eTable 4.** Age and Sex-Standardized Incidence Rate Ratio of Donation in 2014 and 2017 for Potential Donors With Death Due to HIV or Viral Hepatitis

This supplementary material has been provided by the authors to give readers additional information about their work.

**eTable 1. Crude Counts of Actual and Potential Donors per Year**

| <b>Year</b> | <b>Number of Actual Donors</b> | <b>Number of Potential Donors</b> |
|-------------|--------------------------------|-----------------------------------|
| 1999        | 5620                           | 302340                            |
| 2000        | 5756                           | 298107                            |
| 2001        | 5837                           | 293136                            |
| 2002        | 5911                           | 289100                            |
| 2003        | 6152                           | 285560                            |
| 2004        | 6811                           | 271748                            |
| 2005        | 7191                           | 271765                            |
| 2006        | 7623                           | 267181                            |
| 2007        | 7653                           | 265255                            |
| 2008        | 7619                           | 267316                            |
| 2009        | 7644                           | 255462                            |
| 2010        | 7624                           | 258298                            |
| 2011        | 7800                           | 261004                            |
| 2012        | 7797                           | 259494                            |
| 2013        | 7933                           | 267699                            |
| 2014        | 8266                           | 274608                            |
| 2015        | 8703                           | 283521                            |
| 2016        | 9632                           | 294367                            |
| 2017        | 9962                           | 302239                            |

**eTable 2. Crude Counts of Actual and Potential Donors per Race per Year**

| <b>Year</b> | <b>Race</b>                      | <b>Number of Actual Donors</b> | <b>Number of Potential Donors</b> |
|-------------|----------------------------------|--------------------------------|-----------------------------------|
| 1999        | American Indian or Alaska Native | 22                             | 2433                              |
|             | Asian or Pacific Islander        | 136                            | 5576                              |
|             | Black or African American        | 618                            | 52090                             |
|             | White                            | 4262                           | 221848                            |
| 2000        | American Indian or Alaska Native | 15                             | 2395                              |
|             | Asian or Pacific Islander        | 136                            | 5616                              |
|             | Black or African American        | 660                            | 51969                             |
|             | White                            | 4366                           | 217251                            |
| 2001        | American Indian or Alaska Native | 15                             | 2384                              |
|             | Asian or Pacific Islander        | 154                            | 5902                              |
|             | Black or African American        | 710                            | 51666                             |
|             | White                            | 4311                           | 211704                            |
| 2002        | American Indian or Alaska Native | 21                             | 2537                              |
|             | Asian or Pacific Islander        | 132                            | 5812                              |
|             | Black or African American        | 750                            | 50841                             |
|             | White                            | 4339                           | 207793                            |
| 2003        | American Indian or Alaska Native | 19                             | 2709                              |
|             | Asian or Pacific Islander        | 160                            | 6107                              |
|             | Black or African American        | 829                            | 51828                             |
|             | White                            | 4374                           | 202312                            |
| 2004        | American Indian or Alaska Native | 24                             | 2516                              |
|             | Asian or Pacific Islander        | 166                            | 5692                              |
|             | Black or African American        | 953                            | 49787                             |
|             | White                            | 4813                           | 191965                            |
| 2005        | American Indian or Alaska Native | 39                             | 2713                              |
|             | Asian or Pacific Islander        | 160                            | 6152                              |
|             | Black or African American        | 1093                           | 49977                             |
|             | White                            | 4967                           | 190208                            |
| 2006        | American Indian or Alaska Native | 22                             | 2640                              |
|             | Asian or Pacific Islander        | 190                            | 6200                              |
|             | Black or African American        | 1193                           | 49302                             |
|             | White                            | 5224                           | 186182                            |
| 2007        | American Indian or Alaska Native | 39                             | 2699                              |
|             | Asian or Pacific Islander        | 187                            | 6196                              |
|             | Black or African American        | 1205                           | 49621                             |
|             | White                            | 5220                           | 183503                            |
| 2008        | American Indian or Alaska Native | 28                             | 2771                              |
|             | Asian or Pacific Islander        | 194                            | 6363                              |

|      |                                  |      |        |
|------|----------------------------------|------|--------|
|      | Black or African American        | 1234 | 48068  |
|      | White                            | 5191 | 186000 |
| 2009 | American Indian or Alaska Native | 28   | 2868   |
|      | Asian or Pacific Islander        | 200  | 6435   |
|      | Black or African American        | 1246 | 44602  |
|      | White                            | 5199 | 177573 |
| 2010 | American Indian or Alaska Native | 32   | 2799   |
|      | Asian or Pacific Islander        | 193  | 6423   |
|      | Black or African American        | 1283 | 46975  |
|      | White                            | 5146 | 179024 |
| 2011 | American Indian or Alaska Native | 33   | 2951   |
|      | Asian or Pacific Islander        | 207  | 6435   |
|      | Black or African American        | 1245 | 46551  |
|      | White                            | 5262 | 181450 |
| 2012 | American Indian or Alaska Native | 32   | 2918   |
|      | Asian or Pacific Islander        | 231  | 6651   |
|      | Black or African American        | 1329 | 46371  |
|      | White                            | 5234 | 179618 |
| 2013 | American Indian or Alaska Native | 38   | 3059   |
|      | Asian or Pacific Islander        | 202  | 7137   |
|      | Black or African American        | 1335 | 48047  |
|      | White                            | 5309 | 184650 |
| 2014 | American Indian or Alaska Native | 47   | 3300   |
|      | Asian or Pacific Islander        | 235  | 7255   |
|      | Black or African American        | 1298 | 48630  |
|      | White                            | 5588 | 189511 |
| 2015 | American Indian or Alaska Native | 48   | 3431   |
|      | Asian or Pacific Islander        | 242  | 7660   |
|      | Black or African American        | 1423 | 50730  |
|      | White                            | 5821 | 194494 |
| 2016 | American Indian or Alaska Native | 49   | 3445   |
|      | Asian or Pacific Islander        | 284  | 8158   |
|      | Black or African American        | 1513 | 53162  |
|      | White                            | 6506 | 200551 |
| 2017 | American Indian or Alaska Native | 63   | 3606   |
|      | Asian or Pacific Islander        | 276  | 8577   |
|      | Black or African American        | 1550 | 54804  |
|      | White                            | 6663 | 204873 |

**eTable 3. Crude Counts of Actual and Potential Donors per Ethnicity per Year**

| <b>Year</b> | <b>Ethnicity</b>                     | <b>Number of Actual Donors</b> | <b>Number of Potential Donors</b> |
|-------------|--------------------------------------|--------------------------------|-----------------------------------|
| 1999        | Hispanic or Latino                   | 582                            | 20393                             |
|             | Not Hispanic or Latino or Not Stated | 5038                           | 281947                            |
| 2000        | Hispanic or Latino                   | 579                            | 20876                             |
|             | Not Hispanic or Latino or Not Stated | 5177                           | 277231                            |
| 2001        | Hispanic or Latino                   | 647                            | 21480                             |
|             | Not Hispanic or Latino or Not Stated | 5190                           | 271656                            |
| 2002        | Hispanic or Latino                   | 669                            | 22117                             |
|             | Not Hispanic or Latino or Not Stated | 5242                           | 266983                            |
| 2003        | Hispanic or Latino                   | 770                            | 22604                             |
|             | Not Hispanic or Latino or Not Stated | 5382                           | 262956                            |
| 2004        | Hispanic or Latino                   | 855                            | 21788                             |
|             | Not Hispanic or Latino or Not Stated | 5956                           | 249960                            |
| 2005        | Hispanic or Latino                   | 932                            | 22715                             |
|             | Not Hispanic or Latino or Not Stated | 6259                           | 249050                            |
| 2006        | Hispanic or Latino                   | 994                            | 22857                             |
|             | Not Hispanic or Latino or Not Stated | 6629                           | 244324                            |
| 2007        | Hispanic or Latino                   | 1002                           | 23236                             |
|             | Not Hispanic or Latino or Not Stated | 6651                           | 242019                            |
| 2008        | Hispanic or Latino                   | 972                            | 24114                             |
|             | Not Hispanic or Latino or Not Stated | 6647                           | 243202                            |
| 2009        | Hispanic or Latino                   | 971                            | 23984                             |
|             | Not Hispanic or Latino or Not Stated | 6673                           | 231478                            |
| 2010        | Hispanic or Latino                   | 970                            | 23077                             |
|             | Not Hispanic or Latino or Not Stated | 6654                           | 235221                            |
| 2011        | Hispanic or Latino                   | 1053                           | 23617                             |
|             | Not Hispanic or Latino or Not Stated | 6747                           | 237387                            |
| 2012        | Hispanic or Latino                   | 971                            | 23936                             |
|             | Not Hispanic or Latino or Not Stated | 6826                           | 235558                            |
| 2013        | Hispanic or Latino                   | 1049                           | 24806                             |
|             | Not Hispanic or Latino or Not Stated | 6884                           | 242893                            |
| 2014        | Hispanic or Latino                   | 1098                           | 25912                             |
|             | Not Hispanic or Latino or Not Stated | 7168                           | 248696                            |
| 2015        | Hispanic or Latino                   | 1169                           | 27206                             |
|             | Not Hispanic or Latino or Not Stated | 7534                           | 256315                            |
| 2016        | Hispanic or Latino                   | 1280                           | 29051                             |
|             | Not Hispanic or Latino or Not Stated | 8352                           | 265316                            |
| 2017        | Hispanic or Latino                   | 1410                           | 30379                             |
|             | Not Hispanic or Latino or Not Stated | 8552                           | 271860                            |

**eTable 4. Age and Sex-Standardized Incidence Rate Ratio of Donation in 2014 and 2017 for Potential Donors With Death Due to HIV or Viral Hepatitis**

|                                         | <b>2014</b>          | <b>2017</b>          | <b>Yearly Increase</b> |
|-----------------------------------------|----------------------|----------------------|------------------------|
|                                         | <b>aIRR (95% CI)</b> | <b>aIRR (95% CI)</b> | <b>aIRR (95% CI)</b>   |
| <b>White</b>                            | Reference            | Reference            | 1.04 (1.02 – 1.05)     |
| <b>Black</b>                            | 0.61 (0.58 – 0.64)   | 0.46 (0.31 – 0.68)   | 1.02 (0.99 – 1.04)     |
| <b>Asian or Pacific Islander</b>        | 0.87 (0.78 – 0.97)   | 0.70 (0.30 – 1.66)   | 1.02 (0.97 – 1.08)     |
| <b>American Indian or Alaska Native</b> | 0.27 (0.21 – 0.34)   | 0.56 (0.08 – 3.69)   | 1.08 (0.96 – 1.22)     |
| <b>Non-Hispanic/Latino</b>              | Reference            | Reference            | 1.03 (1.02 – 1.04)     |
| <b>Hispanic/Latino</b>                  | 0.93 (0.89 – 0.98)   | 1.00 (0.66 – 1.51)   | 1.03 (1.01 – 1.06)     |

aIRR, adjusted incidence rate ratio; CI, confidence interval.
